# Supplementary material for: Toward Reliable Dipole Moments without Single Excitations: The Role of Orbital Rotations and Dynamical Correlation
Source: PubMed Central journal article supplement (PMC11171297; doi:10.1021/acs.jctc.4c00471), 2024-05-29
Supplement: ct4c00471_si_001.pdf [file ct4c00471_si_001.pdf]

---

# Toward Reliable Dipole Moments without Single Excitations: The Role of Orbital Rotations and Dynamical Correlation

Rahul Chakraborty<sup>1</sup>, Matheus Morato F. de Moraes<sup>1</sup>, Katharina Boguslawski<sup>1</sup>,  
Artur Nowak<sup>1</sup>, Julian Świerczyński<sup>2</sup>, and Paweł Tecmer<sup>1</sup>

<sup>1</sup>*Institute of Physics, Faculty of Physics, Astronomy and Informatics,  
Nicolaus Copernicus University in Torun,  
Grudziadzka 5, 87-100 Torun, Poland*

<sup>2</sup>*Institute of Engineering and Technology, Faculty of Physics, Astronomy, and Informatics,  
Nicolaus Copernicus University in Toruń, 87-100 Toruń, Poland*

Corresponding authors: matheusmorat@gmail.com, k.boguslawski@fizyka.umk.pl,  
ptecmer@fizyka.umk.pl

## Supplementary Information

Table S1: Experimental bond lengths and dipole moments of diatomics studied in this work.

| Type                            | Molecule | Bond length (Å) | $\mu$ (D) |
|---------------------------------|----------|-----------------|-----------|
| Singly-bonded                   | HF       | 0.917           | 1.827     |
|                                 | HCl      | 1.275           | 1.109     |
|                                 | LiH      | 1.596           | 5.882     |
|                                 | NaH      | 1.889           | 6.400     |
|                                 | LiF      | 1.564           | 6.327     |
|                                 | NaCl     | 2.361           | 9.002     |
|                                 | AlF      | 1.654           | 1.515     |
|                                 | ClF      | 1.628           | 0.850     |
|                                 | GaF      | 1.774           | 2.400     |
|                                 | LiNa     | 2.810           | 0.470     |
| Multiply-bonded                 | CO       | 1.128           | 0.112     |
|                                 | CS       | 1.535           | 1.958     |
|                                 | CSe      | 1.676           | 1.990     |
|                                 | SiO      | 1.510           | 3.098     |
|                                 | SiS      | 1.730           | 1.740     |
|                                 | SiSe     | 2.058           | 1.100     |
|                                 | GeO      | 1.625           | 3.282     |
|                                 | GeS      | 2.012           | 2.000     |
| PN                              | 1.491    | 2.751           |           |
| A <sup>2+</sup> B <sup>2-</sup> | MgO      | 1.749           | 6.200     |

Table S2: Dipole moments ( $\mu$  in D) of main-group diatomics in different methods. Frozen core approximation has been used here for all the methods. CC<sub>u</sub> and CC<sub>r</sub> denote unrelaxed and relaxed dipole moments of the corresponding CC methods.

| Molecule | Basis       | pCCD  | pCCD<br>-LCCD | pCCD<br>-LCCSD | CCSD <sub>u</sub> | CCSD(T) <sub>u</sub> | oo-pCCD | oo-pCCD<br>-LCCD | oo-pCCD<br>-LCCSD | CCSD <sub>r</sub> | CCSD(T) <sub>r</sub> |
|----------|-------------|-------|---------------|----------------|-------------------|----------------------|---------|------------------|-------------------|-------------------|----------------------|
| HF       | cc-pVDZ     | 1.915 | 1.899         | 1.814          | 1.822             | 1.817                | 1.861   | 1.857            | 1.861             | 1.830             | 1.819                |
|          | cc-pVTZ     | 1.915 | 1.889         | 1.790          | 1.813             | 1.800                | 1.872   | 1.861            | 1.838             | 1.823             | 1.807                |
|          | cc-pVQZ     | 1.907 | 1.880         | 1.789          | 1.815             | 1.801                | 1.866   | 1.852            | 1.832             | 1.826             | 1.809                |
|          | aug-cc-pVDZ | 1.923 | 1.890         | 1.746          | 1.787             | 1.781                | 1.857   | 1.845            | 1.800             | 1.803             | 1.788                |
|          | aug-cc-pVTZ | 1.915 | 1.880         | 1.749          | 1.794             | 1.782                | 1.860   | 1.845            | 1.806             | 1.808             | 1.791                |
|          | aug-cc-pVQZ | 1.913 | 1.878         | 1.758          | 1.802             | 1.788                | 1.857   | 1.842            | 1.815             | 1.814             | 1.797                |
| HCl      | cc-pVDZ     | 1.386 | 1.378         | 1.339          | 1.329             | 1.312                | 1.344   | 1.346            | 1.404             | 1.323             | 1.312                |
|          | cc-pVTZ     | 1.242 | 1.228         | 1.173          | 1.184             | 1.172                | 1.215   | 1.211            | 1.239             | 1.182             | 1.174                |
|          | cc-pVQZ     | 1.210 | 1.195         | 1.145          | 1.150             | 1.139                | 1.194   | 1.189            | 1.196             | 1.150             | 1.142                |
|          | aug-cc-pVDZ | 1.212 | 1.199         | 1.126          | 1.144             | 1.128                | 1.198   | 1.196            | 1.190             | 1.146             | 1.132                |
|          | aug-cc-pVTZ | 1.175 | 1.147         | 1.049          | 1.093             | 1.081                | 1.158   | 1.149            | 1.126             | 1.097             | 1.086                |
|          | aug-cc-pVQZ | 1.163 | 1.138         | 1.061          | 1.108             | 1.096                | 1.153   | 1.146            | 1.139             | 1.110             | 1.099                |
| LiH      | cc-pVDZ     | 5.903 | 5.857         | 5.681          | 5.735             | 5.735                | 5.721   | 5.753            | 5.951             | 5.735             | 5.735                |
|          | cc-pVTZ     | 5.931 | 5.889         | 5.764          | 5.848             | 5.848                | 5.829   | 5.855            | 6.015             | 5.848             | 5.848                |
|          | cc-pVQZ     | 5.964 | 5.924         | 5.799          | 5.855             | 5.855                | 5.854   | 5.876            | 6.025             | 5.856             | 5.856                |

*Continued on next page*

Table S2 – *Continued from previous page*

| Molecule | Basis       | pCCD  | pCCD<br>-LCCD | pCCD<br>-LCCSD | CCSD <sub>u</sub> | CCSD(T) <sub>u</sub> | oo-pCCD | oo-pCCD<br>-LCCD | oo-pCCD<br>-LCCSD | CCSD <sub>r</sub> | CCSD(T) <sub>r</sub> |
|----------|-------------|-------|---------------|----------------|-------------------|----------------------|---------|------------------|-------------------|-------------------|----------------------|
| LiH      | aug-cc-pVDZ | 5.995 | 5.950         | 5.782          | 5.911             | 5.911                | 5.912   | 5.936            | 6.088             | 5.912             | 5.912                |
|          | aug-cc-pVTZ | 5.972 | 5.932         | 5.811          | 5.872             | 5.872                | 5.873   | 5.894            | 6.037             | 5.873             | 5.873                |
|          | aug-cc-pVQZ | 5.982 | 5.944         | 5.818          | 5.868             | 5.868                | 5.869   | 5.889            | 6.031             | 5.869             | 5.869                |
| NaH      | cc-pVDZ     | 6.959 | 6.871         | 6.557          | 6.423             | 6.423                | 6.610   | 6.657            | 7.011             | 6.424             | 6.424                |
|          | cc-pVTZ     | 6.959 | 6.871         | 6.557          | 6.615             | 6.615                | 6.610   | 6.657            | 7.011             | 6.616             | 6.616                |
|          | cc-pVQZ     | 7.002 | 6.913         | 6.571          | 6.665             | 6.665                | 6.679   | 6.721            | 7.049             | 6.666             | 6.666                |
|          | aug-cc-pVDZ | 7.029 | 6.940         | 6.533          | 6.678             | 6.678                | 6.679   | 6.724            | 7.065             | 6.679             | 6.679                |
|          | aug-cc-pVTZ | 7.028 | 6.940         | 6.617          | 6.692             | 6.692                | 6.693   | 6.734            | 7.058             | 6.693             | 6.693                |
|          | aug-cc-pVQZ | 7.027 | 6.940         | 6.588          | 6.687             | 6.687                | 6.696   | 6.736            | 7.052             | 6.689             | 6.689                |
| LiF      | cc-pVDZ     | 6.464 | 6.427         | 5.991          | 6.195             | 6.173                | 6.363   | 6.350            | 6.140             | 6.232             | 6.179                |
|          | cc-pVTZ     | 6.406 | 6.372         | 6.063          | 6.273             | 6.245                | 6.358   | 6.345            | 6.194             | 6.296             | 6.251                |
|          | cc-pVQZ     | 6.413 | 6.384         | 6.139          | 6.285             | 6.260                | 6.379   | 6.367            | 6.247             | 6.304             | 6.266                |
|          | aug-cc-pVDZ | 6.490 | 6.469         | 6.250          | 6.369             | 6.359                | 6.461   | 6.452            | 6.337             | 6.389             | 6.364                |
|          | aug-cc-pVTZ | 6.451 | 6.424         | 6.202          | 6.322             | 6.304                | 6.411   | 6.399            | 6.295             | 6.341             | 6.311                |
|          | aug-cc-pVQZ | 6.442 | 6.415         | 6.204          | 6.324             | 6.304                | 6.407   | 6.396            | 6.317             | 6.342             | 6.310                |
| NaCl     | cc-pVDZ     | 9.324 | 9.264         | 8.841          | 9.012             | 8.949                | 9.252   | 9.230            | 9.038             | 9.030             | 8.955                |
|          | cc-pVTZ     | 9.182 | 9.128         | 8.834          | 9.047             | 8.997                | 9.201   | 9.184            | 9.057             | 9.057             | 9.000                |
|          | cc-pVQZ     | 9.225 | 9.177         | 8.956          | 9.138             | 9.099                | 9.201   | 9.194            | 9.209             | 9.146             | 9.100                |
|          | aug-cc-pVDZ | 9.350 | 9.321         | 9.088          | 9.231             | 9.199                | 9.346   | 9.339            | 9.225             | 9.242             | 9.203                |
|          | aug-cc-pVTZ | 9.305 | 9.263         | 9.028          | 9.191             | 9.158                | 9.305   | 9.291            | 9.199             | 9.200             | 9.161                |
|          | aug-cc-pVQZ | 9.264 | 9.224         | 9.038          | 9.179             | 9.146                | 9.278   | 9.266            | 9.203             | 9.186             | 9.148                |
| AlF      | cc-pVDZ     | 1.559 | 1.498         | 1.123          | 1.280             | 1.261                | 1.519   | 1.469            | 1.111             | 1.329             | 1.278                |
|          | cc-pVTZ     | 1.372 | 1.348         | 1.226          | 1.286             | 1.265                | 1.375   | 1.347            | 1.179             | 1.314             | 1.279                |
|          | cc-pVQZ     | 1.383 | 1.359         | 1.300          | 1.366             | 1.351                | 1.403   | 1.379            | 1.275             | 1.387             | 1.365                |
|          | aug-cc-pVDZ | 1.433 | 1.418         | 1.352          | 1.430             | 1.431                | 1.496   | 1.475            | 1.314             | 1.458             | 1.442                |
|          | aug-cc-pVTZ | 1.394 | 1.383         | 1.359          | 1.394             | 1.387                | 1.424   | 1.401            | 1.300             | 1.416             | 1.401                |
|          | aug-cc-pVQZ | 1.370 | 1.342         | 1.315          | 1.400             | 1.392                | 1.409   | 1.387            | 1.325             | 1.419             | 1.406                |
| ClF      | cc-pVDZ     | 1.303 | 1.265         | 0.962          | 1.094             | 1.073                | 1.109   | 1.091            | 1.059             | 1.128             | 1.091                |
|          | cc-pVTZ     | 1.119 | 1.069         | 0.799          | 0.968             | 0.921                | 0.979   | 0.954            | 0.907             | 1.002             | 0.951                |
|          | cc-pVQZ     | 1.059 | 1.002         | 0.741          | 0.915             | 0.861                | 0.929   | 0.900            | 0.841             | 0.948             | 0.895                |
|          | aug-cc-pVDZ | 1.073 | 1.013         | 0.738          | 0.884             | 0.865                | 0.875   | 0.853            | 0.832             | 0.923             | 0.890                |
|          | aug-cc-pVTZ | 1.072 | 1.004         | 0.738          | 0.898             | 0.854                | 0.943   | 0.917            | 0.833             | 0.934             | 0.886                |
|          | aug-cc-pVQZ | 1.072 | 1.000         | 0.730          | 0.896             | 0.845                | 0.900   | 0.872            | 0.823             | 0.929             | 0.879                |
| GaF      | cc-pVDZ     | 2.255 | 2.192         | 1.830          | 2.021             | 1.963                | 2.260   | 2.207            | 1.844             | 2.030             | 1.943                |
|          | cc-pVTZ     | 2.172 | 2.130         | 1.926          | 2.098             | 2.043                | 2.216   | 2.181            | 1.963             | 2.079             | 2.009                |
|          | cc-pVQZ     | 2.198 | 2.167         | 2.057          | 2.195             | 2.147                | 2.26    | 2.228            | 2.084             | 2.170             | 2.112                |
|          | aug-cc-pVDZ | 2.301 | 2.281         | 2.187          | 2.318             | 2.290                | 2.397   | 2.370            | 2.172             | 2.307             | 2.261                |
|          | aug-cc-pVTZ | 2.244 | 2.222         | 2.122          | 2.244             | 2.207                | 2.309   | 2.278            | 2.114             | 2.219             | 2.171                |
|          | aug-cc-pVQZ | 2.224 | 2.192         | 2.113          | 2.251             | 2.212                | 2.295   | 2.265            | 2.138             | 2.223             | 2.176                |
| LiNa     | cc-pVDZ     | 0.515 | 0.559         | 0.939          | 0.898             | 0.880                | 0.898   | 0.869            | 0.648             | 0.900             | 0.879                |
|          | cc-pVTZ     | 0.562 | 0.600         | 0.976          | 0.892             | 0.721                | 0.889   | 0.858            | 0.651             | 0.894             | 0.725                |
|          | cc-pVQZ     | 0.570 | 0.609         | 1.001          | 0.898             | 0.671                | 0.895   | 0.862            | 0.661             | 0.900             | 0.677                |
|          | aug-cc-pVDZ | 0.558 | 0.576         | 0.846          | 0.892             | 0.864                | 0.886   | 0.857            | 0.644             | 0.895             | 0.863                |
|          | aug-cc-pVTZ | 0.603 | 0.670         | 1.071          | 0.894             | 0.716                | 0.893   | 0.860            | 0.652             | 0.896             | 0.720                |
|          | aug-cc-pVQZ | 0.590 | 0.646         | 1.069          | 0.898             | 0.653                | 0.901   | 0.868            | 0.661             | 0.900             | 0.661                |
| CO       | cc-pVDZ     | 0.144 | 0.069         | 0.494          | 0.252             | 0.262                | 0.124   | 0.186            | 0.474             | 0.172             | 0.221                |
|          | cc-pVTZ     | 0.164 | 0.086         | 0.446          | 0.178             | 0.210                | 0.089   | 0.146            | 0.397             | 0.106             | 0.167                |
|          | cc-pVQZ     | 0.189 | 0.110         | 0.406          | 0.135             | 0.169                | 0.078   | 0.132            | 0.352             | 0.065             | 0.125                |
|          | aug-cc-pVDZ | 0.265 | 0.165         | 0.421          | 0.172             | 0.182                | 0.073   | 0.132            | 0.386             | 0.097             | 0.141                |

*Continued on next page*

Table S2 – *Continued from previous page*

| Molecule | Basis       | pCCD  | pCCD<br>-LCCD | pCCD<br>-LCCSD | CCSD <sub>u</sub> | CCSD(T) <sub>u</sub> | oo-pCCD | oo-pCCD<br>-LCCD | oo-pCCD<br>-LCCSD | CCSD <sub>r</sub> | CCSD(T) <sub>r</sub> |
|----------|-------------|-------|---------------|----------------|-------------------|----------------------|---------|------------------|-------------------|-------------------|----------------------|
| CO       | aug-cc-pVTZ | 0.278 | 0.184         | 0.388          | 0.141             | 0.170                | 0.074   | 0.129            | 0.355             | 0.070             | 0.126                |
|          | aug-cc-pVQZ | 0.280 | 0.191         | 0.368          | 0.128             | 0.161                | 0.078   | 0.131            | 0.344             | 0.059             | 0.117                |
| CS       | cc-pVDZ     | 1.583 | 1.641         | 2.350          | 1.935             | 1.928                | 1.785   | 1.860            | 2.241             | 1.843             | 1.879                |
|          | cc-pVTZ     | 1.639 | 1.692         | 2.397          | 1.959             | 1.949                | 1.917   | 1.968            | 2.273             | 1.878             | 1.918                |
|          | cc-pVQZ     | 1.685 | 1.728         | 2.419          | 1.979             | 1.963                | 1.963   | 2.009            | 2.288             | 1.898             | 1.937                |
|          | aug-cc-pVDZ | 1.615 | 1.677         | 2.423          | 2.021             | 2.014                | 1.851   | 1.924            | 2.323             | 1.936             | 1.971                |
|          | aug-cc-pVTZ | 1.611 | 1.678         | 2.433          | 2.010             | 1.999                | 1.977   | 2.026            | 2.313             | 1.928             | 1.969                |
|          | aug-cc-pVQZ | 1.626 | 1.680         | 2.416          | 2.000             | 1.984                | 1.983   | 2.028            | 2.305             | 1.919             | 1.959                |
| CSe      | cc-pVDZ     | 1.838 | 1.912         | 2.849          | 2.255             | 2.215                | 2.078   | 2.176            | 2.671             | 2.126             | 2.148                |
|          | cc-pVTZ     | 1.825 | 1.908         | 2.911          | 2.275             | 2.233                | 2.197   | 2.274            | 2.726             | 2.153             | 2.185                |
|          | cc-pVQZ     | 1.857 | 1.927         | 2.927          | 2.268             | 2.222                | 2.226   | 2.297            | 2.718             | 2.146             | 2.178                |
|          | aug-cc-pVDZ | 1.793 | 1.890         | 2.919          | 2.335             | 2.293                | 2.167   | 2.262            | 2.741             | 2.214             | 2.234                |
|          | aug-cc-pVTZ | 1.768 | 1.871         | 2.926          | 2.304             | 2.260                | 2.240   | 2.315            | 2.737             | 2.183             | 2.213                |
|          | aug-cc-pVQZ | 1.763 | 1.848         | 2.878          | 2.277             | 2.230                | 2.238   | 2.309            | 2.718             | 2.155             | 2.187                |
| SiO      | cc-pVDZ     | 3.309 | 3.135         | 1.893          | 2.534             | 2.405                | 3.070   | 2.944            | 2.112             | 2.697             | 2.506                |
|          | cc-pVTZ     | 3.456 | 3.297         | 2.173          | 2.881             | 2.698                | 3.375   | 3.268            | 2.390             | 3.009             | 2.791                |
|          | cc-pVQZ     | 3.610 | 3.447         | 2.310          | 3.089             | 2.908                | 3.531   | 3.430            | 2.573             | 3.207             | 2.998                |
|          | aug-cc-pVDZ | 3.613 | 3.438         | 2.162          | 2.976             | 2.850                | 3.506   | 3.398            | 2.461             | 3.115             | 2.933                |
|          | aug-cc-pVTZ | 3.662 | 3.502         | 2.301          | 3.109             | 2.943                | 3.574   | 3.472            | 2.572             | 3.232             | 3.032                |
|          | aug-cc-pVQZ | 3.686 | 3.527         | 2.343          | 3.157             | 2.984                | 3.584   | 3.484            | 2.626             | 3.273             | 3.073                |
| SiS      | cc-pVDZ     | 1.016 | 0.937         | 0.427          | 0.731             | 0.632                | 1.365   | 1.238            | 0.418             | 0.794             | 0.684                |
|          | cc-pVTZ     | 1.091 | 1.002         | 0.565          | 0.903             | 0.801                | 1.396   | 1.293            | 0.564             | 0.947             | 0.840                |
|          | cc-pVQZ     | 1.044 | 0.975         | 0.646          | 0.952             | 0.862                | 1.380   | 1.285            | 0.623             | 0.993             | 0.898                |
|          | aug-cc-pVDZ | 1.088 | 0.995         | 0.517          | 0.853             | 0.768                | 1.433   | 1.325            | 0.532             | 0.907             | 0.815                |
|          | aug-cc-pVTZ | 1.111 | 1.010         | 0.563          | 0.920             | 0.829                | 1.380   | 1.283            | 0.582             | 0.965             | 0.869                |
|          | aug-cc-pVQZ | 1.106 | 1.021         | 0.638          | 0.955             | 0.869                | 1.292   | 1.212            | 0.661             | 0.997             | 0.904                |
| SiSe     | cc-pVDZ     | 1.786 | 1.609         | 0.362          | 0.997             | 0.840                | 2.174   | 1.983            | 0.488             | 1.167             | 0.977                |
|          | cc-pVTZ     | 1.786 | 1.609         | 0.362          | 1.243             | 1.064                | 2.174   | 1.983            | 0.488             | 1.388             | 1.183                |
|          | cc-pVQZ     | 1.797 | 1.628         | 0.465          | 1.337             | 1.166                | 2.190   | 2.007            | 0.571             | 1.473             | 1.278                |
|          | aug-cc-pVDZ | 1.828 | 1.616         | 0.278          | 1.156             | 1.010                | 2.254   | 2.048            | 0.462             | 1.310             | 1.134                |
|          | aug-cc-pVTZ | 1.861 | 1.652         | 0.321          | 1.261             | 1.095                | 2.146   | 1.960            | 0.501             | 1.404             | 1.212                |
|          | aug-cc-pVQZ | 1.860 | 1.659         | 0.399          | 1.339             | 1.171                | 2.178   | 1.998            | 0.573             | 1.474             | 1.282                |
| GeO      | cc-pVDZ     | 3.752 | 3.524         | 1.697          | 2.712             | 2.516                | 3.214   | 3.072            | 2.149             | 2.926             | 2.663                |
|          | cc-pVTZ     | 3.893 | 3.699         | 2.027          | 3.092             | 2.833                | 3.569   | 3.451            | 2.502             | 3.260             | 2.959                |
|          | cc-pVQZ     | 4.069 | 3.857         | 2.067          | 3.311             | 3.051                | 3.739   | 3.628            | 2.697             | 3.462             | 3.168                |
|          | aug-cc-pVDZ | 4.120 | 3.921         | 2.175          | 3.287             | 3.096                | 3.805   | 3.687            | 2.669             | 3.467             | 3.210                |
|          | aug-cc-pVTZ | 4.168 | 3.957         | 2.052          | 3.364             | 3.126                | 3.815   | 3.703            | 2.732             | 3.521             | 3.241                |
|          | aug-cc-pVQZ | 4.174 | 3.961         | 2.043          | 3.406             | 3.157                | 3.819   | 3.709            | 2.776             | 3.553             | 3.270                |
| GeS      | cc-pVDZ     | 2.514 | 2.325         | 0.964          | 1.730             | 1.523                | 2.900   | 2.675            | 1.141             | 1.896             | 1.672                |
|          | cc-pVTZ     | 2.625 | 2.432         | 1.131          | 1.993             | 1.765                | 2.956   | 2.779            | 1.298             | 2.120             | 1.887                |
|          | cc-pVQZ     | 2.608 | 2.436         | 1.264          | 2.116             | 1.902                | 2.978   | 2.812            | 1.419             | 2.233             | 2.014                |
|          | aug-cc-pVDZ | 2.685 | 2.482         | 1.133          | 2.008             | 1.814                | 3.070   | 2.882            | 1.348             | 2.151             | 1.944                |
|          | aug-cc-pVTZ | 2.646 | 2.459         | 1.170          | 2.075             | 1.866                | 2.983   | 2.812            | 1.362             | 2.201             | 1.985                |
|          | aug-cc-pVQZ | 2.647 | 2.470         | 1.250          | 2.137             | 1.929                | 2.981   | 2.819            | 1.435             | 2.253             | 2.039                |
| PN       | cc-pVDZ     | 2.578 | 2.486         | 1.968          | 2.394             | 2.290                | 2.493   | 2.422            | 2.155             | 2.474             | 2.368                |
|          | cc-pVTZ     | 2.868 | 2.736         | 2.140          | 2.638             | 2.482                | 2.704   | 2.634            | 2.377             | 2.714             | 2.582                |
|          | cc-pVQZ     | 2.984 | 2.844         | 2.247          | 2.762             | 2.595                | 2.795   | 2.726            | 2.488             | 2.833             | 2.700                |
|          | aug-cc-pVDZ | 2.931 | 2.794         | 2.223          | 2.688             | 2.581                | 2.782   | 2.715            | 2.419             | 2.771             | 2.660                |
|          | aug-cc-pVTZ | 3.023 | 2.871         | 2.240          | 2.765             | 2.614                | 2.821   | 2.752            | 2.478             | 2.843             | 2.716                |

*Continued on next page*

Table S2 – *Continued from previous page*

| Molecule | Basis       | pCCD  | pCCD<br>-LCCD | pCCD<br>-LCCSD | CCSD <sub>u</sub> | CCSD(T) <sub>u</sub> | oo-pCCD | oo-pCCD<br>-LCCD | oo-pCCD<br>-LCCSD | CCSD <sub>r</sub> | CCSD(T) <sub>r</sub> |
|----------|-------------|-------|---------------|----------------|-------------------|----------------------|---------|------------------|-------------------|-------------------|----------------------|
| PN       | aug-cc-pVQZ | 3.062 | 2.904         | 2.290          | 2.807             | 2.643                | 2.830   | 2.762            | 2.523             | 2.880             | 2.749                |
|          | cc-pVDZ     | 8.366 | 8.041         | 4.423          | 4.934             | 3.838                | 4.158   | 4.122            | 5.758             | 4.600             | 4.952                |
|          | cc-pVTZ     | 8.377 | 8.036         | 3.962          | 5.996             | 4.696                | 4.109   | 4.075            | 5.940             | 5.721             | 5.706                |
| MgO      | cc-pVQZ     | 8.430 | 8.089         | 3.752          | 6.576             | 5.256                | 3.949   | 3.923            | 5.996             | 6.316             | 6.196                |
|          | aug-cc-pVDZ | 8.366 | 8.041         | 4.423          | 6.573             | 5.341                | 4.158   | 4.122            | 5.758             | 6.349             | 6.294                |
|          | aug-cc-pVTZ | 8.377 | 8.036         | 3.962          | 6.759             | 5.470                | 4.109   | 4.075            | 5.940             | 6.513             | 6.404                |
|          | aug-cc-pVQZ | 8.430 | 8.089         | 3.752          | 6.911             | 5.608                | 3.949   | 3.923            | 5.996             | 6.664             | 6.510                |

Table S3: Error analysis w.r.t. experimental values for the dataset of 20 main group diatomics studied in this work. Errors are calculated as  $|\mu_{\text{Method}} - \mu_{\text{Exp.}}|$ 

| Quantity | Basis       | pCCD  | pCCD<br>-LCCD | pCCD<br>-LCCSD | CCSD <sub>u</sub> | CCSD(T) <sub>u</sub> | oo-pCCD | oo-pCCD<br>-LCCD | oo-pCCD<br>-LCCSD | CCSD <sub>r</sub> | CCSD(T) <sub>r</sub> |
|----------|-------------|-------|---------------|----------------|-------------------|----------------------|---------|------------------|-------------------|-------------------|----------------------|
| MUE      | cc-pVDZ     | 0.385 | 0.325         | 0.600          | 0.303             | 0.399                | 0.334   | 0.347            | 0.493             | 0.278             | 0.313                |
|          | cc-pVTZ     | 0.387 | 0.316         | 0.552          | 0.181             | 0.273                | 0.339   | 0.325            | 0.409             | 0.183             | 0.204                |
|          | cc-pVQZ     | 0.412 | 0.336         | 0.520          | 0.169             | 0.203                | 0.363   | 0.348            | 0.365             | 0.181             | 0.143                |
|          | aug-cc-pVDZ | 0.426 | 0.344         | 0.498          | 0.170             | 0.222                | 0.355   | 0.337            | 0.403             | 0.164             | 0.157                |
|          | aug-cc-pVTZ | 0.437 | 0.356         | 0.530          | 0.180             | 0.194                | 0.363   | 0.345            | 0.373             | 0.191             | 0.148                |
|          | aug-cc-pVQZ | 0.442 | 0.363         | 0.520          | 0.193             | 0.173                | 0.376   | 0.357            | 0.349             | 0.205             | 0.143                |
| RMSE     | cc-pVDZ     | 0.599 | 0.513         | 0.787          | 0.441             | 0.655                | 0.574   | 0.560            | 0.610             | 0.457             | 0.452                |
|          | cc-pVTZ     | 0.601 | 0.506         | 0.766          | 0.260             | 0.442                | 0.585   | 0.565            | 0.512             | 0.266             | 0.290                |
|          | cc-pVQZ     | 0.631 | 0.531         | 0.763          | 0.255             | 0.322                | 0.627   | 0.606            | 0.463             | 0.251             | 0.234                |
|          | aug-cc-pVDZ | 0.633 | 0.530         | 0.688          | 0.269             | 0.336                | 0.607   | 0.579            | 0.505             | 0.252             | 0.258                |
|          | aug-cc-pVTZ | 0.640 | 0.535         | 0.753          | 0.276             | 0.300                | 0.604   | 0.581            | 0.476             | 0.262             | 0.244                |
|          | aug-cc-pVQZ | 0.651 | 0.545         | 0.764          | 0.290             | 0.271                | 0.636   | 0.614            | 0.447             | 0.276             | 0.240                |

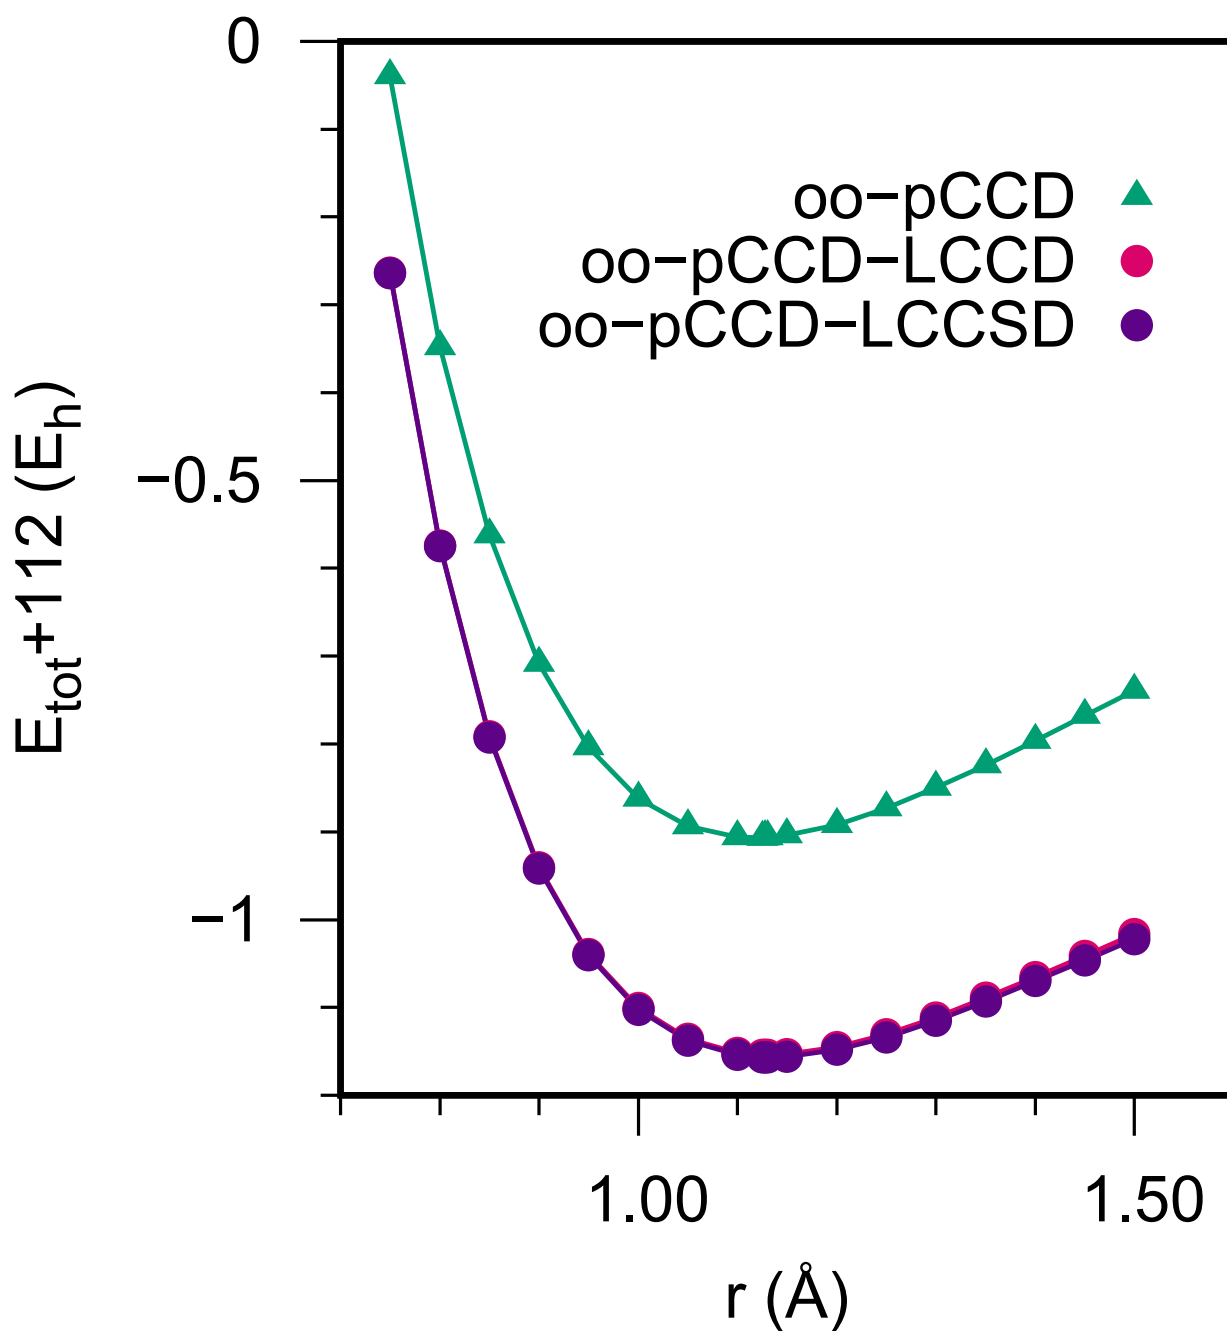

Figure S1: Potential energy surface of CO with oo-pCCD method and its dynamic correlation correction variants in aug-cc-pVTZ basis.

Table S4: Dipole moment ( $\mu$  in D) of diatomic molecules in aug-cc-pVQZ basis set without frozen core.  $CC_u$  and  $CC_r$  denote unrelaxed and relaxed dipole moments of the corresponding CC methods.

| Species | pCCD  | pCCD-LCCD | pCCD-LCCSD | CCSD <sub>u</sub> | CCSD(T) <sub>u</sub> | oo-pCCD | oo-pCCD-LCCD | oo-pCCD-LCCSD | CCSD <sub>r</sub> | CCSD(T) <sub>r</sub> |
|---------|-------|-----------|------------|-------------------|----------------------|---------|--------------|---------------|-------------------|----------------------|
| HF      | 1.913 | 1.878     | 1.764      | 1.806             | 1.792                | 1.855   | 1.840        | 1.819         | 1.818             | 1.800                |
| HCl     | 1.163 | 1.138     | 1.055      | 1.104             | 1.092                | 1.151   | 1.144        | 1.133         | 1.107             | 1.095                |
| LiH     | 5.984 | 5.945     | 5.798      | 5.854             | 5.851                | 5.912   | 5.927        | 5.994         | 5.856             | 5.851                |
| NaH     | 7.028 | 6.946     | 6.452      | 6.577             | 6.551                | 6.740   | 6.778        | 6.960         | 6.578             | 6.553                |
| LiF     | 6.444 | 6.416     | 6.186      | 6.311             | 6.288                | 6.413   | 6.399        | 6.290         | 6.328             | 6.295                |
| NaCl    | 9.265 | 9.232     | 8.990      | 9.144             | 9.102                | 9.285   | 9.274        | 9.153         | 9.154             | 9.108                |
| AlF     | 1.371 | 1.345     | 1.379      | 1.439             | 1.432                | 1.394   | 1.373        | 1.374         | 1.456             | 1.446                |
| ClF     | 1.072 | 1.001     | 0.744      | 0.908             | 0.853                | 0.897   | 0.868        | 0.839         | 0.940             | 0.887                |
| GaF     | 2.224 | 2.188     | 2.090      | 2.270             | 2.252                | 2.295   | 2.261        | 2.117         | 2.309             | 2.267                |
| LiNa    | 0.587 | 0.649     | 0.800      | 0.678             | 0.653                | 0.897   | 0.882        | 0.473         | 0.676             | 0.662                |
| CO      | 0.280 | 0.191     | 0.376      | 0.131             | 0.166                | 0.084   | 0.139        | 0.352         | 0.062             | 0.122                |
| CS      | 1.629 | 1.684     | 2.469      | 2.024             | 2.006                | 1.996   | 2.043        | 2.349         | 1.939             | 1.981                |
| CSe     | 1.764 | 1.850     | 2.891      | 2.252             | 2.204                | 2.266   | 2.334        | 2.710         | 2.134             | 2.170                |
| SiO     | 3.687 | 3.528     | 2.378      | 3.193             | 3.013                | 3.686   | 3.576        | 2.545         | 3.304             | 3.102                |
| SiS     | 1.107 | 1.022     | 0.655      | 0.976             | 0.885                | 1.364   | 1.273        | 0.630         | 1.016             | 0.922                |
| SiSe    | 1.899 | 1.683     | 0.422      | 1.428             | 1.252                | 2.068   | 1.892        | 0.630         | 1.553             | 1.350                |
| GeO     | 4.176 | 3.957     | 1.822      | 3.377             | 3.114                | 3.862   | 3.735        | 2.401         | 3.550             | 3.252                |
| GeS     | 2.649 | 2.473     | 1.056      | 2.081             | 1.850                | 3.081   | 2.901        | 1.007         | 2.214             | 1.982                |
| PN      | 3.063 | 2.907     | 2.327      | 2.839             | 2.664                | 2.826   | 2.760        | 2.559         | 2.907             | 2.773                |
| MgO     | 8.430 | 8.088     | 4.139      | 6.859             | 5.526                | 3.510   | 3.551        | 5.232         | 6.660             | 6.484                |

Figure S2: Distance dependence of the calculated dipole moment components in aug-cc-pVTZ basis for the  $H_2O \cdots Rg$  [ $Rg = He, Ne, Ar, \text{ and } Kr$ ] complexes.

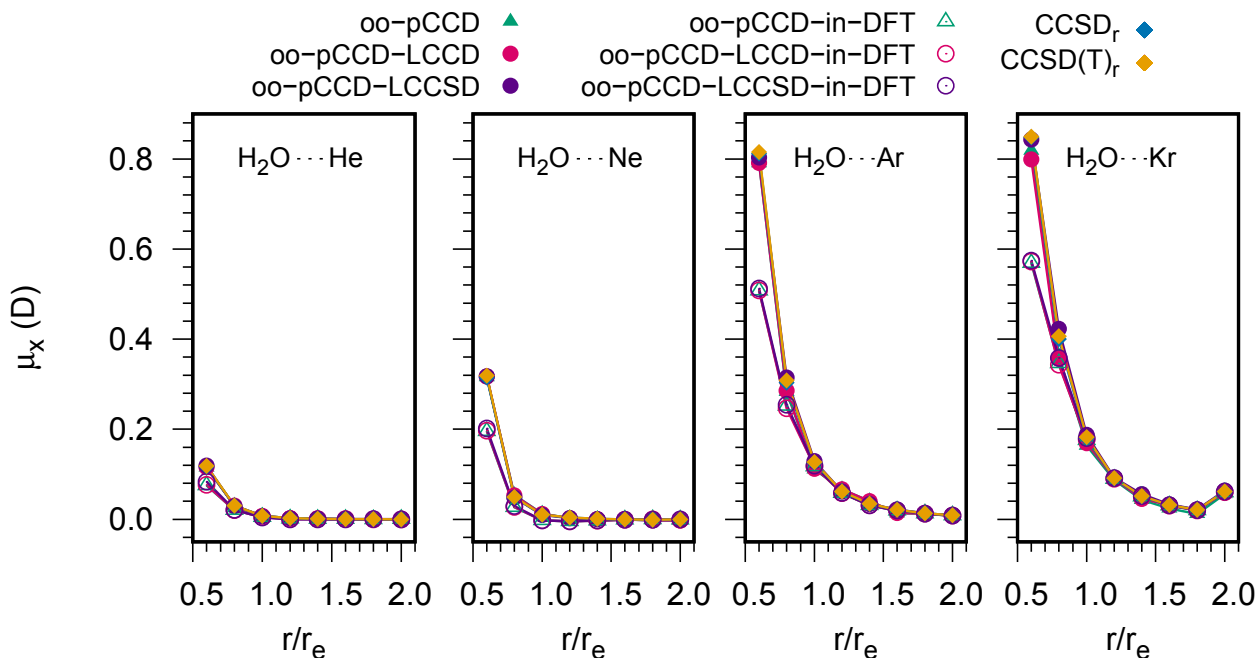

Table S5: Dipole moment surface of the HF molecule in aug-cc-pVTZ basis.

| r (Å) | oo-pCCD | oo-pCCD-LCCD | oo-pCCD-LCCSD | CCSD <sub>r</sub> | CCSD(T) <sub>r</sub> |
|-------|---------|--------------|---------------|-------------------|----------------------|
| 0.75  | -1.606  | -1.594       | -1.541        | -1.548            | -1.538               |
| 0.80  | -1.681  | -1.668       | -1.616        | -1.625            | -1.613               |
| 0.85  | -1.758  | -1.745       | -1.697        | -1.703            | -1.688               |
| 0.90  | -1.835  | -1.820       | -1.778        | -1.781            | -1.765               |
| 0.917 | -1.860  | -1.845       | -1.806        | -1.808            | -1.791               |
| 0.95  | -1.908  | -1.892       | -1.862        | -1.860            | -1.841               |
| 1.00  | -1.974  | -1.958       | -1.946        | -1.938            | -1.917               |
| 1.10  | -2.080  | -2.065       | -2.112        | -2.088            | -2.060               |
| 1.15  | -2.100  | -2.089       | -2.200        | -2.158            | -2.127               |
| 1.175 | -2.111  | -2.100       | -2.239        | -2.191            | -2.158               |
| 1.20  | -2.118  | -2.108       | -2.278        | -2.223            | -2.188               |
| 1.30  | -2.134  | -2.127       | -2.407        | -2.334            | -2.291               |
| 1.35  | -2.088  | -2.085       | -2.475        | -2.378            | -2.330               |
| 1.40  | -2.048  | -2.048       | -2.524        | -2.412            | -2.358               |
| 1.45  | -1.992  | -1.995       | -2.563        | -2.436            | -2.374               |
| 1.50  | -1.921  | -1.928       | -2.589        | -2.447            | -2.377               |
| 1.55  | -1.801  | -1.812       | -2.581        | -2.446            | -2.366               |
| 1.575 | -1.791  | -1.803       | -2.605        | -2.440            | -2.354               |
| 1.60  | -1.742  | -1.756       | -2.603        | -2.430            | -2.338               |
| 1.65  | -1.637  | -1.655       | -2.590        | -2.399            | -2.294               |
| 1.70  | -1.526  | -1.547       | -2.565        | -2.354            | -2.234               |
| 1.75  | -1.412  | -1.436       | -2.528        | -2.293            | -2.158               |
| 1.80  | -1.296  | -1.323       | -2.482        | -2.217            | -2.067               |
| 1.85  | -1.182  | -1.211       | -2.426        | -2.126            | -1.963               |
| 1.90  | -1.071  | -1.102       | -2.364        | -2.023            | -1.851               |
| 1.95  | -0.965  | -0.997       | -2.298        | -1.909            | -1.734               |
| 2.00  | -0.866  | -0.898       | -2.227        | -1.786            | -1.619               |
| 2.05  | -0.773  | -0.806       | -2.155        | -1.656            | -1.512               |
| 2.10  | -0.687  | -0.720       | -2.082        | -1.523            | -1.421               |
| 2.15  | -0.609  | -0.642       | -2.009        | -1.388            | -1.353               |
| 2.20  | -0.538  | -0.571       | -1.937        | -1.253            | -1.317               |
| 2.25  | -0.474  | -0.507       | -1.867        | -1.122            | -1.320               |
| 2.30  | -0.417  | -0.449       | -1.799        | -0.996            | -1.368               |
| 2.35  | -0.366  | -0.397       | -1.734        | -0.877            | -1.469               |
| 2.40  | -0.321  | -0.351       | -1.671        | -0.765            | -1.625               |
| 2.45  | -0.281  | -0.311       | -1.611        | -0.662            | -1.838               |
| 2.50  | -0.246  | -0.275       | -1.554        | -0.567            | -2.110               |
| 2.75  | -0.127  | -0.151       | -1.311        | -0.219            | —                    |
| 3.00  | -0.067  | -0.086       | -1.131        | -0.033            | —                    |
| 3.50  | -0.022  | -0.040       | -0.906        | —                 | —                    |
| 4.00  | -0.009  | -0.030       | -0.803        | —                 | —                    |



Table S6: Dipole moment surface of the CO molecule in aug-cc-pVTZ basis.

| r (Å) | oo-pCCD | oo-pCCD-LCCD | oo-pCCD-LCCSD | CCSD <sub>r</sub> | CCSD(T) <sub>r</sub> |
|-------|---------|--------------|---------------|-------------------|----------------------|
| 0.75  | 1.291   | 1.295        | 1.240         | 1.224             | 1.223                |
| 0.80  | 1.162   | 1.170        | 1.135         | 1.105             | 1.106                |
| 0.85  | 1.014   | 1.027        | 1.025         | 0.972             | 0.978                |
| 0.90  | 0.860   | 0.879        | 0.905         | 0.828             | 0.838                |
| 0.95  | 0.697   | 0.722        | 0.781         | 0.674             | 0.691                |
| 1.00  | 0.527   | 0.559        | 0.656         | 0.511             | 0.536                |
| 1.05  | 0.352   | 0.392        | 0.534         | 0.342             | 0.378                |
| 1.10  | 0.174   | 0.224        | 0.417         | 0.169             | 0.217                |
| 1.125 | 0.085   | 0.140        | 0.362         | 0.081             | 0.137                |
| 1.128 | 0.074   | 0.129        | 0.355         | 0.070             | 0.127                |
| 1.13  | 0.068   | 0.123        | 0.351         | 0.063             | 0.120                |
| 1.15  | -0.003  | 0.056        | 0.309         | -0.008            | 0.056                |
| 1.20  | -0.179  | -0.107       | 0.213         | -0.186            | -0.103               |
| 1.25  | -0.349  | -0.265       | 0.132         | -0.364            | -0.259               |
| 1.30  | -0.513  | -0.415       | 0.069         | -0.541            | -0.410               |
| 1.35  | -0.664  | -0.55        | 0.025         | -0.716            | -0.555               |
| 1.40  | -0.806  | -0.675       | 0.006         | -0.887            | -0.693               |
| 1.45  | -0.935  | -0.786       | 0.014         | -1.055            | -0.821               |
| 1.50  | -1.048  | -0.879       | 0.066         | -1.218            | -0.939               |

Table S7: Potential energy surface of the CO molecule in aug-cc-pVTZ basis.

| r (Å) | oo-pCCD     | oo-pCCD-LCCD | oo-pCCD-LCCSD |
|-------|-------------|--------------|---------------|
| 0.75  | -112.039847 | -112.263221  | -112.264186   |
| 0.80  | -112.347900 | -112.573941  | -112.574974   |
| 0.85  | -112.562476 | -112.791373  | -112.792613   |
| 0.90  | -112.708294 | -112.940263  | -112.941638   |
| 0.95  | -112.803726 | -113.038946  | -113.040487   |
| 1.00  | -112.862264 | -113.100881  | -113.102623   |
| 1.05  | -112.893868 | -113.136013  | -113.137993   |
| 1.10  | -112.905944 | -113.151733  | -113.153993   |
| 1.125 | -112.906435 | -113.154085  | -113.156501   |
| 1.128 | -112.906275 | -113.154165  | -113.156602   |
| 1.13  | -112.906164 | -113.15419   | -113.156638   |
| 1.15  | -112.903983 | -113.153519  | -113.156103   |
| 1.20  | -112.892097 | -113.145475  | -113.148426   |
| 1.25  | -112.873341 | -113.130644  | -113.134004   |
| 1.30  | -112.850002 | -113.111302  | -113.115103   |
| 1.35  | -112.823797 | -113.089152  | -113.093311   |
| 1.40  | -112.796049 | -113.065542  | -113.070078   |
| 1.45  | -112.767685 | -113.041273  | -113.046226   |
| 1.50  | -112.739429 | -113.016702  | -113.022521   |

Table S8: Equilibrium bond parameters of the  $\text{H}_2\text{O} \cdots \text{Rg}$  [ $\text{Rg} = \text{He}, \text{Ne}, \text{Ar}, \text{Kr}$ ] complexes used in this work. [HM10]

| Species                               | $r_e$ (Å) | $\theta_e$    |
|---------------------------------------|-----------|---------------|
| $\text{H}_2\text{O} \cdots \text{He}$ | 3.186     | $79^\circ$    |
| $\text{H}_2\text{O} \cdots \text{Ne}$ | 3.228     | $76^\circ$    |
| $\text{H}_2\text{O} \cdots \text{Ar}$ | 3.651     | $100^\circ$   |
| $\text{H}_2\text{O} \cdots \text{Kr}$ | 3.884     | $109.3^\circ$ |

Table S9: Supramolecular dipole moments ( $\mu$  in D) of the binary complexes in aug-cc-pVTZ basis.  $\text{CC}_u$  and  $\text{CC}_r$  denote unrelaxed and relaxed dipole moments of the corresponding CC methods. The errors with respect to reference  $\text{CCSD}(\text{T})_r$  values are calculated as  $\epsilon = \mu_{\text{Method}} - \mu_{\text{CCSD}(\text{T})_r}$ .

| Species                               | oo-pCCD | $\epsilon$ | oo-pCCD-LCCD | $\epsilon$ | oo-pCCD-LCCSD | $\epsilon$ | $\text{CCSD}_r$ | $\epsilon$ | $\text{CCSD}(\text{T})_r$ |
|---------------------------------------|---------|------------|--------------|------------|---------------|------------|-----------------|------------|---------------------------|
| $\text{CO}-\text{HF}$                 | 2.586   | -0.030     | 2.630        | -0.014     | 2.866         | -0.250     | 2.571           | -0.045     | 2.616                     |
| $\text{CO}-\text{HCl}$                | 1.698   | -0.007     | 1.745        | 0.040      | 1.983         | 0.278      | 1.652           | -0.053     | 1.705                     |
| $\text{N}_2-\text{HF}$                | 2.371   | 0.047      | 2.357        | 0.043      | 2.329         | 0.005      | 2.335           | 0.011      | 2.324                     |
| $\text{N}_2-\text{HCl}$               | 1.497   | 0.064      | 1.488        | 0.055      | 1.466         | 0.033      | 1.441           | 0.008      | 1.433                     |
| $\text{H}_2\text{O} \cdots \text{He}$ | 1.928   | 0.107      | 1.910        | 0.089      | 1.835         | 0.032      | 1.844           | 0.023      | 1.821                     |
| $\text{H}_2\text{O} \cdots \text{Ne}$ | 1.918   | 0.110      | 1.899        | 0.091      | 1.821         | 0.013      | 1.831           | 0.023      | 1.808                     |
| $\text{H}_2\text{O} \cdots \text{Ar}$ | 1.905   | 0.104      | 1.887        | 0.086      | 1.810         | 0.009      | 1.822           | 0.021      | 1.801                     |
| $\text{H}_2\text{O} \cdots \text{Kr}$ | 1.940   | 0.096      | 1.922        | 0.078      | 1.863         | 0.019      | 1.865           | 0.021      | 1.844                     |

## References

- [HM10] Anastasios Haskopoulos and George Maroulis. “Interaction electric hyperpolarizability effects in weakly bound  $\text{H}_2\text{O} \cdots \text{Rg}$  ( $\text{Rg} = \text{He}, \text{Ne}, \text{Ar}, \text{Kr}$  and  $\text{Xe}$ ) complexes.” In: *J. Phys. Chem. A* 114.33 (2010), pp. 8730–8741.
